1 **On the relationship between high-order linkage disequilibrium and**  
2 **epistasis**

3

4 Yanjun Zan<sup>1\*</sup>, Simon K. G. Forsberg<sup>1\*+</sup> and Örjan Carlborg<sup>1§</sup>

5 <sup>1</sup>Department of Medical Biochemistry and Microbiology, Uppsala University, SE-751  
6 23 Uppsala, Sweden

7

8 \*Authors contributed equally

9 <sup>+</sup>Present address: Ecology and Evolutionary Biology Department; Lewis Sigler  
10 Institute for Integrative Genomics, Princeton University, Princeton, New Jersey,  
11 08540 and Department of Neuroscience, Functional Pharmacology, Uppsala  
12 University, BMC, Box 593, 751 24 Uppsala, Sweden

13 <sup>§</sup>Corresponding author: [orjan.carlborg@imbim.uu.se](mailto:orjan.carlborg@imbim.uu.se)

14 Örjan Carlborg

15 Uppsala University

16 Medical Biochemistry and Microbiology

17 BMC Box 582, SE-751 23, Uppsala, Sweden.

18 Phone: +46 18 4714592

19

20 Keywords: *Arabidopsis thaliana*, High order linkage disequilibrium, Epistasis,

21 Molybdenum, Leaf

22

23 Data availability:

24 i) Genome wide re-sequencing data are available as part of *Arabidopsis thaliana* 1001

25 genomes project <http://1001genomes.org/data-center.html>, ii) 250 K SNP chip data

26 were available in the *Arabidopsis thaliana* Regmap panel

27 ([http://bergelson.uchicago.edu/?page\\_id=790](http://bergelson.uchicago.edu/?page_id=790)), iii) The Molybdenum level for 340

28 *Arabidopsis thaliana* are available in

29 <https://doi.org/10.1371/journal.pgen.1005648.s005>. iv) Corresponding genotypes are

30 extracted from a subset of the Regmap panel

31 ([http://bergelson.uchicago.edu/?page\\_id=790](http://bergelson.uchicago.edu/?page_id=790)).

32

33 Running title: High-order LD and statistical epistasis

34

## ABSTRACT

35 A plausible explanation for statistical epistasis revealed in genome wide association  
36 analyses is the presence of high order linkage disequilibrium (LD) between the  
37 genotyped markers tested for interactions and unobserved functional polymorphisms.  
38 Based on findings in experimental data, it has been suggested that high order LD  
39 might be a common explanation for statistical epistasis inferred between local  
40 polymorphisms in the same genomic region. Here, we empirically evaluate how  
41 prevalent high order LD is between local, as well as distal, polymorphisms in the  
42 genome. This could provide insights into whether we should account for this when  
43 interpreting results from genome wide scans for statistical epistasis. An extensive and  
44 strong genome wide high order LD was revealed between pairs of markers on the high  
45 density 250k SNP-chip and individual markers revealed by whole genome sequencing  
46 in the *A. thaliana* 1001-genomes collection. The high order LD was found to be more  
47 prevalent in smaller populations, but present also in samples including several  
48 hundred individuals. An empirical example illustrates that high order LD might be an  
49 even greater challenge in cases when the genetic architecture is more complex than  
50 the common assumption of bi-allelic loci. The example shows how significant  
51 statistical epistasis is detected for a pair of markers in high order LD with a complex  
52 multi allelic locus. Overall, our study illustrates the importance of considering also  
53 other explanations than functional genetic interactions when genome wide statistical  
54 epistasis is detected, in particular when the results are obtained in small populations of  
55 inbred individuals.  
56

57

## INTRODUCTION

58 The genetic architecture of most biological traits is complex and involves multiple  
59 genes, whose effects are often influenced by interactions with other genes and  
60 environmental factors. To study the relative contributions by genes, environmental  
61 factors and their interactions in segregating populations, statistical genetic approaches  
62 are commonly used to partition the genetic variance to additive and dominance  
63 variance of individual loci and epistatic interaction variance between them (Lynch  
64 and Walsh 1998). In principle, the variance partitioning is performed by associating  
65 the phenotypic variation for a trait in a population with linear combinations of the  
66 genotypes within and/or across loci. How the genotypes are combined (parameterized)  
67 in the model is determined by the genetic model used in the analysis. The classic  
68 quantitative genetics models are parameterized to capture the genetic variance in a  
69 hierarchical manner. First, a main additive allele-substitution is defined. Then, if  
70 accounted for, dominance is modeled as a single-locus deviation from additivity and  
71 genetic interactions as multi-locus deviations from single locus additivity and  
72 dominance (Nelson *et al.* 2013). As a consequence of this, the genetic contributions of  
73 individual and combinations of loci described as additive, dominance and epistatic  
74 variances are unlikely to reflect the underlying biological mechanisms (Carlborg *et al.*  
75 2006; Phillips 2008; Huang *et al.* 2012; Sackton and Hartl 2016; Forsberg *et al.* 2017).  
76

77 Although the ultimate aim of a genetic association study is generally to detect  
78 functional polymorphisms, most often genotypes are only scored for a reduced set of  
79 polymorphisms (genetic markers). These reduced marker sets are selected with the  
80 aim to tag as many of the unobserved functional polymorphisms as possible. The  
81 statistical inferences of the underlying genetic architecture made from such reduced  
82 sets of markers can, however, be problematic in some cases. For example, multiple  
83 unobserved functional polymorphisms can lead to associations to individual markers  
84 that do not properly represent the causal variants (Platt *et al.* 2010), and high order  
85 linkage disequilibrium (LD) to single functional polymorphism can lead to indirect  
86 statistical epistatic associations to pairs of markers (Wood *et al.* 2014). Here, we focus  
87 on high order linkage disequilibrium defined as when two genotyped markers tag an  
88 un-genotyped polymorphism (see Materials and Methods section). It is still unknown  
89 how prevalent and strong such high order LD is in the genome, making it difficult to

90 estimate how many reported pairwise statistical epistatic interactions are due to such  
91 LD. However, the study by *Wood et al* (*Wood et al.* 2014) presented results  
92 suggesting that many of the significant statistical epistatic interactions detected  
93 between pairs of local markers by *Hemani et al.* (*Hemani et al.* 2014) might be due to  
94 high-order LD to unobserved, linked sequence polymorphisms in the same genomic  
95 region. Many past and current studies of genetic interactions in, for example,  
96 *Drosophila*, plant, animal and human populations (*Shimomura et al.* 2001; *Anholt et*  
97 *al.* 2003; *Caicedo et al.* 2004; *Segrè et al.* 2004; *Carlborg et al.* 2006; *Hemani et al.*  
98 2014) rely on genome-wide statistical analyses of pairwise interactions between  
99 selected sets of markers as in (*Hemani et al.* 2014). With the increasing interest in,  
100 and availability of, sufficiently large datasets for epistatic association analyses it is  
101 therefore important to also evaluate the risk of making false inferences about loci  
102 being involved in functional genetic interactions from findings of statistical epistasis,  
103 when they instead are due to high order LD.

104

105 Here, we empirically explore the prevalence and strength of high order LD within and  
106 between chromosomes in publically available high-density SNP and whole-genome  
107 re-sequencing data from the model plant *Arabidopsis thaliana*. Two locus LDs are  
108 calculated between the markers selected for the 250k *A. thaliana* SNP chip that have  
109 been the basis for many GWAS analyses in the past, and the additional SNPs revealed  
110 by whole genome sequencing using data from the 1001 genomes project (*Atwell et al.*  
111 2010; *Cao et al.* 2011; *Horton et al.* 2012; *Schmitz et al.* 2013; *Alonso-Blanco et al.*  
112 2016). Strong high order LD was found to be common both within and across  
113 chromosomes between pairs of markers from the SNP-chip and the sequencing  
114 polymorphisms and often the combined genotype of the marker pair tagged the  
115 genotype of the sequencing markers better than any single marker on the SNP chip.  
116 The risk of falsely inferring genetic interactions between markers on different  
117 chromosomes in a two-locus interaction analysis might increase in situations when the  
118 underlying genetic architecture is more complex, for example when a single locus  
119 contains multiple functional alleles. This is illustrated using an empirical example  
120 from a second public *A. thaliana* dataset (*Forsberg et al.* 2015). Overall, this study  
121 provides new insights that deepen our understanding about the link between high  
122 order LD and statistical epistasis to guide researchers when interpreting results

123 obtained from epistatic genetic association analyses.

124

## 125 MATERIALS AND METHODS

126

### 127 **Methods**

128 When an individual marker is in complete linkage disequilibrium ( $r^2 = 1$ ) with a  
129 functional polymorphism affecting a studied trait, a single-locus association test  
130 between the marker and the trait will capture all the phenotypic variance contributed  
131 by the functional polymorphism. A basic assumption in genetic association studies is  
132 that at least one genotyped marker will be in sufficiently high LD with each functional  
133 polymorphism to detect it in this way. In reality, however, not all functional  
134 polymorphism will be in such perfect LD with a genotyped marker, and then there is a  
135 risk that the joint genotype of two (or more) markers tags the genotype of the  
136 functional polymorphism better than any single marker (high-order LD > single-  
137 marker LD). This will, as discussed below, influence the significances of the trait-  
138 marker associations detected in a genetic association analysis and the inferences made  
139 about the genetic architecture of the trait.

140

#### 141 *Quantifying high order linkage disequilibrium*

142 We calculate the high order LD between pairs of predictors (here genotyped SNP  
143 markers) and single targets (here un-genotyped SNP polymorphisms) following (Hao  
144 *et al.* 2007).

145

146 Consider a pair of bi-allelic predictor SNPs ( $M_1$  and  $M_2$ ; Figure 1). These markers can  
147 together form four two-locus genotypes: AB, Ab, aB and ab (Figure 1). We now want  
148 to know whether any two-locus predictor could tag the single locus target genotype  
149 better than any of the individual predictor genotypes (i.e. evaluate whether  
150  $\max(\text{second-order LD}) > \max(\text{single order LD})$ ). To calculate the high order LD  
151 between the two predictors ( $M_1$  and  $M_2$ ) and the single target (Q), the two-locus  
152  $M_1M_2$  genotype is used to create a multi-allelic pseudo marker (P) with four alleles  
153 (Figure 1). In this way, a second-order LD ( $r^2$ ) can be calculated for each of the  
154 possible ways that  $M_1$  and  $M_2$  together can tag the genotype at Q (Figure 1).

155

156 The calculation of the second order LD therefore first involves creating the four  
 157 possible bi-allelic pseudomarkers ( $P_1$ ,  $P_2$ ,  $P_3$  &  $P_4$ ; Figure 1) from the two locus  
 158  $M_1/M_2$  genotypes. These are assigned the genotypes  $P_1\{AB, \text{non-AB}\}$ ,  $P_2\{Ab, \text{non-}$   
 159  $Ab\}$ ,  $P_3\{aB, \text{non-aB}\}$  and  $P_4\{ab, \text{non-ab}\}$ , respectively. The  $LD-r^2$  is then computed  
 160 between the target ( $Q$ ) and the four bi-allelic pseudomarkers ( $P_1$ ,  $P_2$ ,  $P_3$  &  $P_4$ ). For  
 161 each pair of predictors, the second order LD is then defined as the  $LD-r^2$  for the  
 162 pseudomarker with the highest  $LD-r^2$  to the target. Pseudomarkers with higher  $LD-r^2$   
 163 to the target ( $Q$ ) than 0.3 are kept for further analyses. The  $LD-r^2$  values were  
 164 computed using the software *LdCompare* (Hao *et al.* 2007).

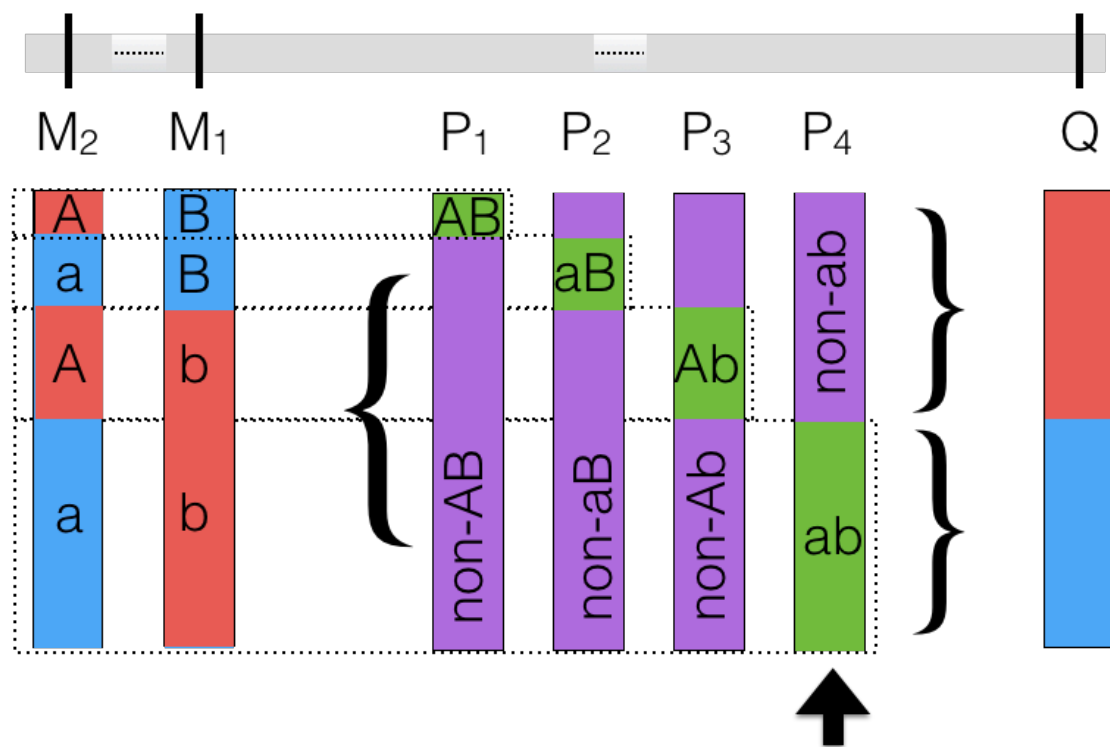

165  
 166 **Figure 1.** Illustration of how the pseudomarkers ( $P_1$ ,  $P_2$ ,  $P_3$ ,  $P_4$ ) used in the estimation of the second  
 167 order linkage disequilibrium between a pair of linked or unlinked markers (predictors;  $M_1$  and  $M_2$ )  
 168 and a third linked or unlinked functional polymorphism (target;  $Q$ ) are created. The pseudomarkers  
 169 together represent the possible bi-allelic formulations of the two-locus  $M_1M_2$  genotypes. The maximum  
 170 pairwise  $LD-r^2$  between the target and the four pseudomarkers ( $P_4$ ) defines the second order LD  
 171 between the predictors ( $M_1$ ,  $M_2$ ) and the target ( $Q$ ).

172

173

174 *Statistical epistasis emerging from high order linkage disequilibrium*

175 In a genetic association study in an inbred or haploid population, two-locus epistasis

176 is typically modelled as:

177

$$178 \quad Y = a_1\beta_1 + a_2\beta_2 + a_1a_2\beta_{12} + e \quad [1]$$

179

180 Here,  $a_1$  and  $a_2$  are indicator variables for the genotypes at two genotyped markers,  $M_1$   
181 and  $M_2$ , taking values 1/-1 for the two alternative homozygous genotypes AA vs aa  
182 and BB vs bb, respectively.  $a_1a_2$  is an indicator variable for the interaction between  $a_1$   
183 and  $a_2$  taking value 1 for the two-locus genotypes AABB and aabb and -1 for AAbb  
184 and aaBB.  $\beta_1$ ,  $\beta_2$  and  $\beta_{12}$  are the corresponding estimates for the marginal (additive)  
185 effects and the additive-by-additive interaction between the loci.

186

187 The aim of a statistical epistatic analysis is to include an interaction term in the model  
188 [1] to estimate the deviations of the two-locus genotype-values (AABB, AAbb, aaBB  
189 and aabb) from the predictions obtained by the marginal (additive) effects (Alvarez-  
190 Castro and Carlborg 2007). However, a non-zero estimate of the interaction term in  
191 model [1] does not, as noted e.g. by Wood et al. (Wood *et al.* 2014) necessarily have  
192 to result from a genetic interaction. It could, for example, instead emerge from a  
193 second-order LD between two markers and a single functional polymorphism. Here,  
194 refer back to Figure 1. Now assume that a trait is determined by a single functional  
195 locus (Q). Two markers,  $M_1$  and  $M_2$ , are genotyped but neither of these markers  
196 individually tag the causal genotype (blue) at Q well. However, the causal (blue)  
197 allele at Q is tagged perfectly by one of the two-locus  $M_1M_2$  genotypes (ab; Figure 1),  
198 while the other three  $M_1M_2$  two-locus genotypes (aB, Ab and AA; Figure 1) are only  
199 present together with the no-effect (red) allele at locus Q. When fitting model [1] to  
200 the genotypes of marker  $M_1$  and  $M_2$ , the estimate for the interaction term ( $\beta_{12}$ ) will be  
201 non-zero, illustrating how statistical epistasis can emerge from the second-order LD  
202 between  $M_1$  and  $M_2$  and Q. This example illustrates a scenario similar to what was  
203 empirically observed in (Wood *et al.* 2014), where physically linked markers in low  
204 LD with each other tagged haplotypes that were in high order LD with a  
205 polymorphism that was unobserved in the original study.

206

207 *Classifying identified high order linkage disequilibrium triplets depending on the*  
208 *distance between the loci*



209 Here, we evaluate the prevalence and strength of high order LD between pairs of  
210 markers selected for genotyping on a 250k SNP chip (predictors) and a third locus  
211 revealed by whole genome sequencing (targets) using publicly available datasets in *A.*  
212 *thaliana* (Cao *et al.* 2011; Alonso-Blanco *et al.* 2016). Three types of high order LD  
213 are defined based on the locations of the predictors relative to the target. If both  
214 predictors are located within 1Mb of the target it is classified as cis-cis. If only one  
215 predictor is closer than 1Mb it is classified as cis-trans. If none is closer than 1Mb it is  
216 classified as trans-trans. The choice of a 1Mb threshold to define cis vs trans  
217 predictors is arbitrary, but we consider it useful for evaluating how common high  
218 order LD is between predictors near (local/cis) and far (global/trans) from the target.

219

## 220 **Material**

221

222 *The genome wide prevalence of high order linkage disequilibrium in publically*  
223 *available Arabidopsis thaliana datasets*

224 The *A. thaliana* 1001-genomes project has released complete genome sequences for  
225 hundreds of wild collected accessions (<http://www.1001genomes.org>). Here, we used  
226 whole-genome SNP data on 728 accessions scored by whole genome re-sequencing  
227 (Cao *et al.* 2011; Alonso-Blanco *et al.* 2016). The predictors used in our analysis was  
228 a subset of the SNPs selected for the 250k *A. thaliana* SNP chip (Horton *et al.* 2012)  
229 ( $n = 200,352$  in total;  $MAF > 0.05$ ) and the targets a subset of the SNPs revealed  
230 using whole-genome re-sequencing ( $n = 1,641,240$  in total;  $MAF > 0.05$ ) (Table 1).  
231 Although the results from the analyses of this data will be specific to this species and  
232 dataset, it is assumed that the relationships between targets and predictors will be a  
233 realistic representation of what to be expected also in other populations. This is  
234 because the selection of markers for the high-density 250k SNP chip, was done for the  
235 purpose of genetic association studies following similar procedures as used also in  
236 other species and populations.

237

238 The reason for only studying a subset of the possible targets and predictors is that it  
239 was not computationally feasible to exhaustively evaluate the high order LD between  
240 all possible pairs of predictors selected for the 250k SNP chip and all the targets  
241 revealed by genome sequencing. Instead, the second order LD was exhaustively



242 calculated for all targets and predictors i) within a randomly selected 6 Mb window on  
243 chromosome 2 as well as ii) between three randomly selected windows from different  
244 chromosomes (Table 1). Computations were performed for the entire population (n =  
245 728 individuals) and two smaller random samples of n = 100 and n = 50 individuals.  
246 The results for the populations with n = 100 and n = 728 are reported in the main  
247 manuscript and the results for n = 50 is reported in the Supplementary material.

248

249 **Table 1.** *Regions and SNPs selected for evaluation of second order LD.*

|              | Window 1      | Window 2      | Targets <sup>1</sup> | Predictors <sup>2</sup> | Filtered targets <sup>3</sup> |
|--------------|---------------|---------------|----------------------|-------------------------|-------------------------------|
| Region 1     | Chr2: 8-14Mb  | -             | 70,712               | 6,053                   | -                             |
| Regionpair 1 | Chr1: 10-12Mb | Chr3: 10-12Mb | 29,133               | 6,245                   | 20,239                        |
| Regionpair 2 | Chr2: 10-12Mb | Chr4: 10-12Mb | 23,751               | 5,302                   | 15,887                        |
| Regionpair 3 | Chr2: 10-12Mb | Chr3: 10-12Mb | 23,751               | 5,212                   | 15,884                        |
| Genome       |               |               | 1,486,942            | 154,298                 | 1,229,012                     |

250 <sup>1</sup>Total number of polymorphic SNPs in the evaluated windows/genome in the population revealed via  
251 whole-genome re-sequencing (Alonso-Blanco *et al.* 2016). <sup>2</sup>Total number of polymorphic SNPs in the  
252 two windows/genome included on the 250k AT SNP-chip (Horton *et al.* 2012); <sup>3</sup>Number of target SNPs  
253 in the two windows/genome with  $LD-r^2 < 0.6$  to any individual predictor.

254

255 The predictor pairs in the evaluated windows in the genome with high order  $LD-r^2 >$   
256 0.6 to a target were classified as cis-cis/cis-trans/trans-trans. To extrapolate these  
257 findings to the genome level, the proportions of all evaluated predictor pairs that  
258 displayed these patterns were calculated and then multiplied with the total number of  
259 possible cis-cis/cis-trans/trans-trans pairs in the genome (Table S1).

260

261 *Analyzing a public A. thaliana dataset for two locus statistical epistasis*

262 A publicly available dataset including 340 *Arabidopsis thaliana* accessions were used  
263 for a genome wide association analysis. In short, the plants were grown in a controlled  
264 environment with 6 biological replicate plants per accession. Analyses by Inductively  
265 Coupled Mass Spectroscopy (ICP-MS) provided estimates of leaf molybdenum  
266 concentration as described in (Baxter *et al.* 2010; Forsberg *et al.* 2015). The  
267 accessions were genotyped for 141,385 SNP markers with  $MAF > 0.15$  (Atwell *et al.*  
268 2010; Baxter *et al.* 2010; Shen *et al.* 2012; Forsberg *et al.* 2015). A more thorough  
269 description of the dataset can be found in (Baxter *et al.* 2010; Forsberg *et al.* 2015). In  
270 an earlier study of this dataset (Forsberg *et al.* 2015), it was revealed that a large

271 fraction of the genetic variance for this trait was explained by a single linkage block  
272 containing several low-frequency, large effect structural variants that were poorly  
273 tagged by the genotyped SNPs. This linkage block was originally identified due to its  
274 large marginal, variance heterogeneity effect in the population (Shen *et al.* 2012). It is  
275 known that statistical epistasis and genetic variance heterogeneity can emerge from  
276 similar genetic architectures (Forsberg *et al.* 2015), and this population was therefore  
277 selected for further evaluations of whether high order LD between the genotyped  
278 SNPs and these hidden polymorphisms could lead to statistical epistasis in a two locus  
279 association analysis. We performed an exhaustive, two-dimensional genome scan for  
280 pairwise statistical epistasis between the genotyped markers and the level of  
281 molybdenum in the leaf using the software *plink* (Purcell *et al.* 2007) without control  
282 for population structure. Thereafter, each pair of loci that passed the genome wide  
283 significance threshold in the initial scan was fitted in a two-locus epistatic genetic  
284 model [1] using *hglm* function in *hglm* package (Rönnegård *et al.* 2010) to correct for  
285 the possible effects of population structure via the genomic kinship matrix as in  
286 (Forsberg *et al.* 2015). The significance threshold used to infer significant interacting  
287 pairs ( $p < 3.2 \times 10^{-10}$ ) was defined as a Bonferroni corrected nominal 5% significance  
288 threshold. The correction was done for an estimated number of independent  
289 association tests assumed to equal the number of independent LD blocks in the *A.*  
290 *thaliana* genome as described in (Lachowiec *et al.* 2015).

291

#### 292 *Data availability*

293 Genome wide re-sequencing data are available as part of the *Arabidopsis thaliana*  
294 1001 genomes project <http://1001genomes.org/data-center.html>. The 250 K SNP chip  
295 data are available as part of the genotype data for the *Arabidopsis thaliana* Regmap  
296 panel ([http://bergelson.uchicago.edu/?page\\_id=790](http://bergelson.uchicago.edu/?page_id=790)). The Molybdenum levels for the  
297 340 *Arabidopsis thaliana* accessions are available in  
298 <https://doi.org/10.1371/journal.pgen.1005648.s005>

299

300

## 301 **RESULTS**

302 This study aims to answer the following questions by analyzing two public *A.*  
303 *thaliana* datasets: How common can we expect high order LD to be between pairs of

304 SNPs selected for genotyping and hidden sequence variants in the genome? Is high  
305 order LD primarily observed between predictors tightly linked to a target functional  
306 polymorphism (in cis) as in (Wood *et al.* 2014), or is it also observed for predictors  
307 unlinked to the target (in trans)? How dependent is the prevalence of high order LD  
308 and cis vs trans predictors on the population size? We also present an empirical  
309 example where high order LD exists between a cis-trans predictor pair with  
310 significant statistical epistasis and a locus displaying a strong genetic variance  
311 heterogeneity due to independent contributions by multiple linked polymorphisms  
312 (Forsberg *et al.* 2015). This illustrates how complex inheritance patterns of individual  
313 loci, something usually not explored in GWAS data, further complicates the  
314 interpretation of detected statistical epistatic signals.

315

316 *The population size affects the prevalence and location of predictors in high order LD*  
317 The high order LD- $r^2$  values for all pairs of predictors and individual targets in a 6Mb  
318 window on Chromosome 2 (Table 1) is shown for populations with  $n = 100$  and  $n =$   
319  $728$  individuals in Figure 2. The strongest second order LD- $r^2$  was observed where at  
320 least one predictor is located near the target (y-axis). When the sample size was  
321 smaller ( $n = 100$ ; Figure 2A), strong second order LD- $r^2$  was rather common also  
322 when both predictors were located far from the target. For example, 20% of the  
323 targets had a high order LD- $r^2 > 0.65$  with a predictor pair where at least one of the  
324 predictors was located more than 1Mb away from it. Even though the prevalence of  
325 strong high order LD- $r^2$  decreases when the sample size increases, it is still common  
326 in the large population ( $n = 728$ ; Figure 2B), with the highest prevalence when at least  
327 one of the predictors is located close to the target.

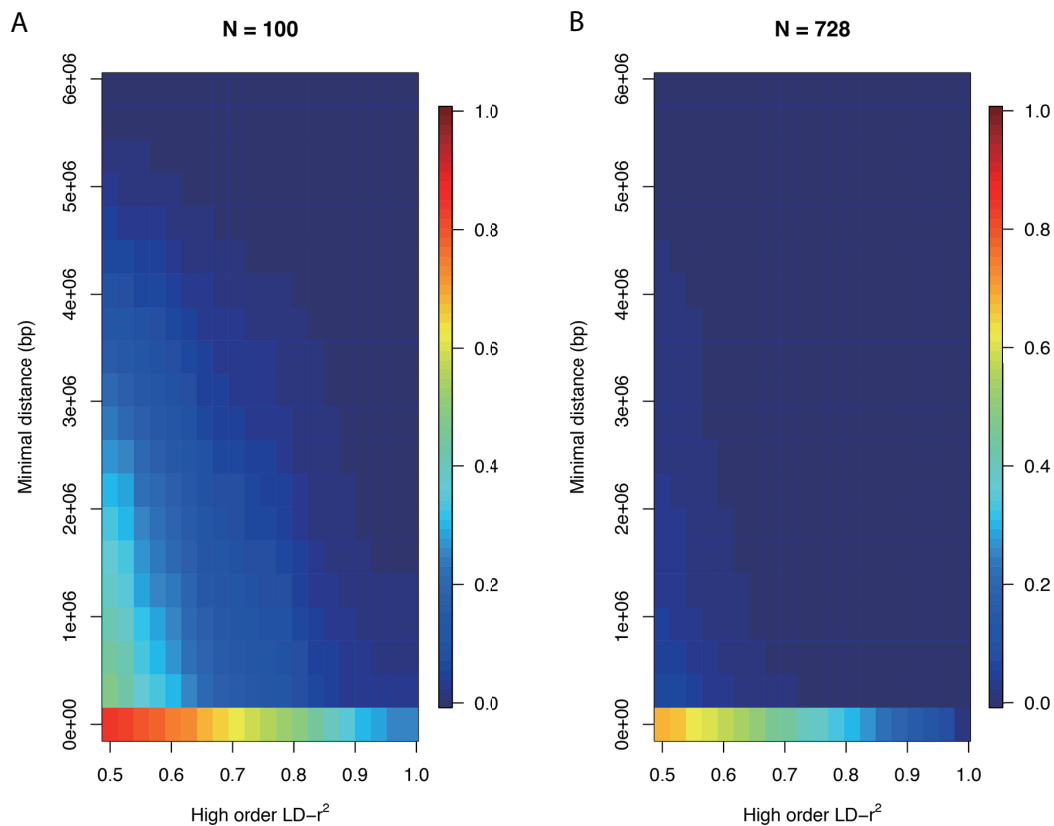

328

329 **Figure 2.** Illustration of how the prevalence of high order LD- $r^2$  to the targets in a 6Mb window on *A.*  
330 *thaliana* chromosome 2 (8 – 14Mb) depends on distance of the predictors from the target. The color  
331 gradient illustrates the proportion of predictor pairs that reach a particular LD- $r^2$  (x-axis) depending  
332 on the distance between the nearest predictor and the target (y-axis). Results are presented for  
333 populations with  $n = 100$  (A) and  $n = 728$  (B) individuals.

334

335 Strong high-order LD- $r^2$  between a predictor pair and a target is mostly observed  
336 when at least one of the predictors is in strong individual LD- $r^2$  with the target.  
337 However, as illustrated in Figure 3, many cases also exist where the high order LD- $r^2$   
338 is strong while the LD- $r^2$  to the individual predictors is weak.

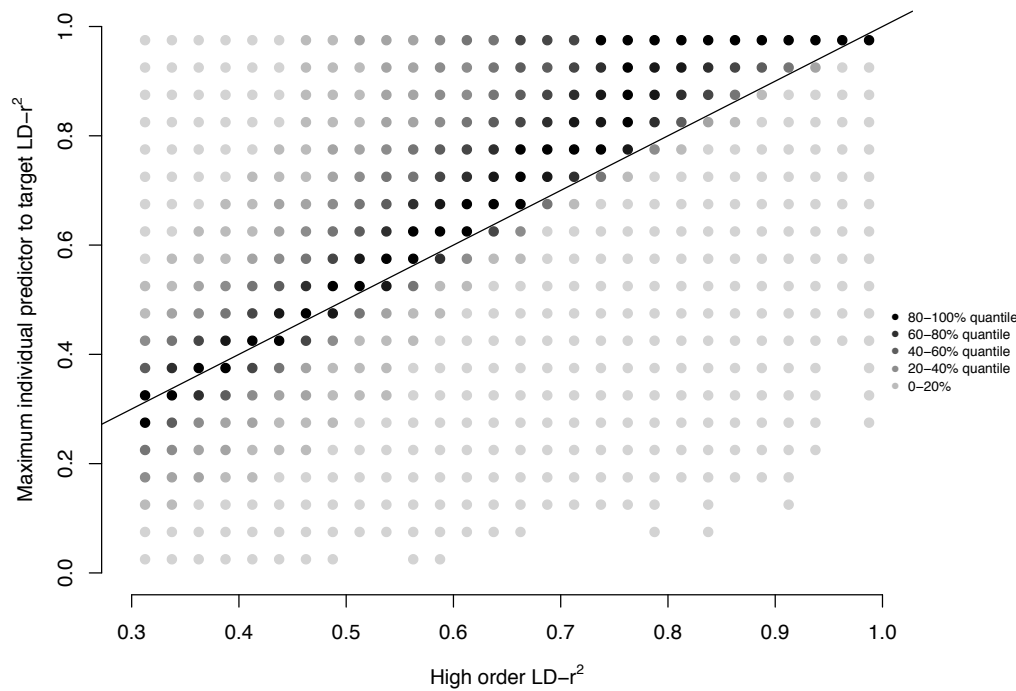

339

340 **Figure 3.** Strong second order LD- $r^2$  exists also when the individual predictor to target LD- $r^2$  is weak.

341 The intensity of each dot illustrates the number of cases with a particular high order LD- $r^2$  / maximum

342 individual predictor to target LD- $r^2$  combination. Dots below the line are cases where the high order

343 LD- $r^2$  stronger than any individual predictor to target LD- $r^2$  ( $n=728$ ).

344

345 *Estimating the genome wide prevalence of strong high order linkage disequilibrium*

346 Figure 2 illustrates that high-order LD- $r^2$  exists where one or both predictors are

347 located close to the target as well as when one or both predictors are located further

348 away in the evaluated 6Mb window. The genome-wide prevalence of high order LD-

349  $r^2$  for the three different classes of predictor pairs, cis-cis/cis-trans/trans-trans (as

350 defined above) were next explored in three pairs of distant 2Mb windows in the

351 genome (Table 1) to provide data to estimate their genome-wide prevalence. Here,

352 only cases when individual predictors in the windows had lower individual LD- $r^2$  than

353 0.6 to the targets were considered.

354

355 Overall, the fraction of predictor pairs that display higher second-order LD (LD- $r^2 >$

356 0.6) is low. In the smaller population ( $n = 100$ ), less than 1 out of  $10^6$  evaluated

357 predictor pairs and in the larger population ( $n = 768$ ) less than 1 out of  $10^7$  (Table S1).

358 However, since the total number of evaluated pairs was very large (around  $10^{11}$ ),

359 many cases were still detected. Regardless of population size, cis-cis and cis-trans  
 360 pairs dominated (42/44% for  $n = 100$ , and 56/58% for  $n = 728$ ; Figure 4A-C; Table  
 361 S1). Trans-trans pairs existed, but were much less common ( $\sim 1\%$  for  $n = 100$ ,  $<0.01\%$   
 362 for  $n = 728$ , respectively, Figure 4A-C; Table S1). When extrapolating these results to  
 363 a genome wide scale, this picture, however, changes dramatically (Figure 4D). Trans-  
 364 trans and cis-trans predictor pairs are now much more common than cis-cis pairs due  
 365 to their much higher genome-wide prevalence (35/18-fold for  $n = 100$  and 35/0.3 for  
 366  $n = 728$  more common; Figure 4D, Table S1). This result illustrates that it is a  
 367 considerable risk to disregard high-order LD as a possible explanation for statistical  
 368 epistatic interactions even at larger sample-sizes.  
 369

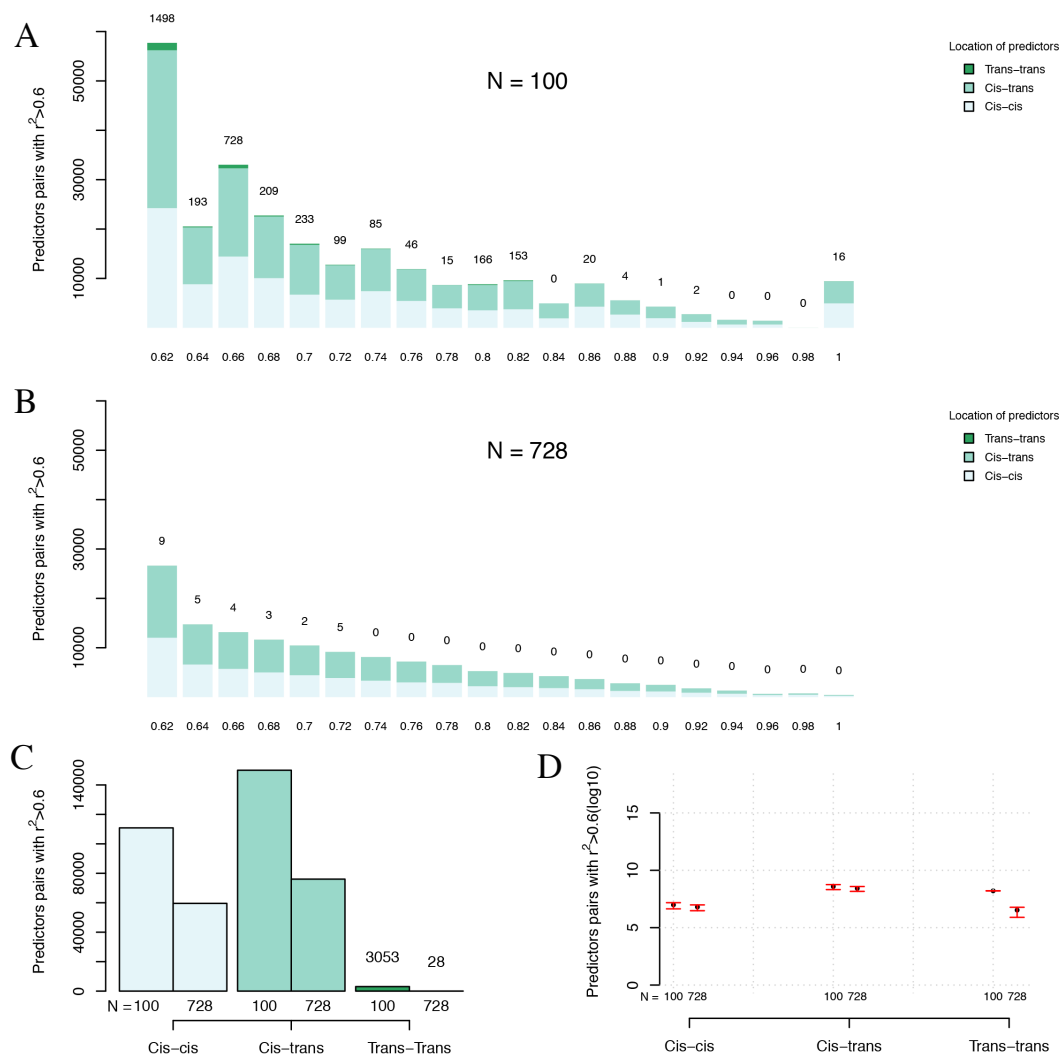

370  
 371 **Figure 4.** Number of predictor pairs of different classes in strong high order LD- $r^2$  ( $>0.6$ ) to targets  
 372 detected in the evaluated windows and estimated genome wide. The distribution of LD- $r^2$  values  $> 0.6$

373 for the cis-cis, cis-trans,trans-trans predictor pairs for (A;  $n = 100$ ) and (B;  $n = 728$ ) The total number  
374 of predictor pairs with high order LD- $r^2$  above 0.6 in the three classes are summarized in (C) and used  
375 to estimate the total expected number of predictor pairs in the entire genome (D; error bars show the  
376 estimation error estimated from the results obtained for the three window (Materials and Methods).

377

378 *Linking high order LD and statistical epistasis in a two locus epistatic association*  
379 *analysis in A. thaliana*

380 A publicly available dataset including 340 *Arabidopsis thaliana* accessions were used  
381 for a genome wide association analysis for leaf molybdenum concentration This  
382 dataset was earlier used by (Forsberg *et al.* 2015) to dissect a locus with a highly  
383 significant variance heterogeneity association for leaf molybdenum concentration  
384 (Shen *et al.* 2012) to the contributions of four independent associations in an extended  
385 LD block on chromosome 2. Several of these associations were found to structural  
386 variants that were poorly tagged by the SNP markers (Forsberg *et al.* 2015). Our  
387 pairwise genome wide scans for pairs of epistatic loci identified 396 significant SNP  
388 pairs. For 290 pairs both markers were located in the narrow region on chromosome 2  
389 that was earlier dissected in detail (Forsberg *et al.* 2015). All these are examples of  
390 cis-cis predictor pairs. The remaining 106 pairs contained one predictor in the  
391 chromosome 2 region and another one elsewhere in the genome, being examples of  
392 cis-trans predictor pairs.

393

394 The strongest pairwise epistasis was detected for a cis-trans predictor pair (Figure 5A).  
395 The accessions with the AA genotype at the predictor located in trans to the  
396 chromosome 2 region (chromosome 1:5,315,502 bp) all have an intermediate  
397 molybdenum level in the leaf (Figure 5A). The accessions with the GG allele at the  
398 trans predictor have different levels of molybdenum in their leaves depending on  
399 whether they carry the CC or TT genotype at the cis predictor in on chromosome 2  
400 (10,928,720 bp). These differences explain the significant statistical epistasis detected  
401 when fitting the two-locus epistatic model [1] to this data.

402

403 This statistical interaction could be due to a true genetic interaction. An alternative  
404 explanation is however presented in Figure 5 There, the overlap between the two  
405 locus genotypes for the cis-trans predictor pair (Figure 5A) and the alleles at the four



406 loci earlier reported to be associated with leaf molybdenum levels in this region  
 407 (Forsberg *et al.* 2015) are illustrated. The multi-locus genotypes of the predictor pair  
 408 tags different combinations of minor alleles at the four loci that were found to either  
 409 increase (mGWA1, mGWA2, 326ins) or decrease (53del) leaf molybdenum levels in  
 410 the accessions (Forsberg *et al.* 2015). The statistical epistatic interaction was detected  
 411 due to the difference in molybdenum levels between accessions carrying the GGCC  
 412 genotype (low molybdenum) and GGTT (high molybdenum). Figure 5B shows that  
 413 the accessions with the GGCC genotype have the lowest frequency of the  
 414 molybdenum increasing allele mGWA2 and the highest frequency of the molybdenum  
 415 decreasing allele 53del. The accessions with the GGTT genotype instead have the  
 416 highest frequencies of the molybdenum increasing alleles at mGWA2, mGWA1 and  
 417 326ins. The genotypes AACC and AATT, with intermediate molybdenum levels, both  
 418 have intermediate frequencies of the mGWA1 and mGWA1 increasing alleles and  
 419 lack the 53del and 326ins alleles. A more parsimonious interpretation of these results  
 420 is thus that the statistical epistasis at the predictor pair is due to the high order LD  
 421 between them and the genotypes at the four loci located in the region on chromosome  
 422 2.

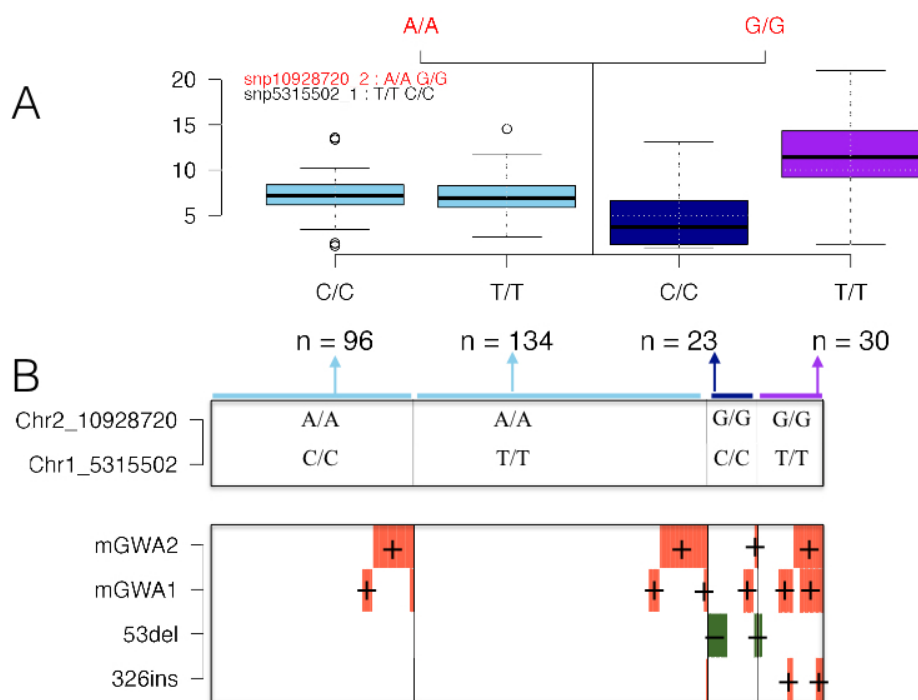

423  
 424 **Figure 5.** An illustration of how the high order LD between four polymorphisms affecting the level of  
 425 molybdenum in the *A. thaliana* leaf (Forsberg *et al.* 2015), likely explains the significant statistical

426 *epistasis detected for a cis-trans predictor pair. (A) Boxplots illustrating the phenotypic distribution in*  
427 *the four genotype classes defined by the cis-trans predictor pair with the strongest significant epistatic*  
428 *interaction to the level of molybdenum in the *A. thaliana* leaf. (B) Illustration of the connection*  
429 *between the two-locus genotypes of the predictor pair and the minor alleles at the four linked loci*  
430 *associated with this trait on chromosome 2 (Forsberg et al. 2015). The top box in (B) illustrates the*  
431 *two-locus genotype for the predictor pair, with the width of each sub-box indicating the number of*  
432 *individuals in each genotype class in the population. In the bottom box in (B), each individual is*  
433 *represented as a column, where green (molybdenum decreasing) and orange (molybdenum increasing)*  
434 *colors indicates that the individual carry the minor alleles at the four loci identified in (Forsberg et al.*  
435 *2015). *mGWA1* and *mGWA2* are SNP markers associated with the trait and *53del* and *326* are*  
436 *structural polymorphisms (Forsberg et al. 2015).*

437

438

## DISCUSSION

439 High order linkage disequilibrium between combinations of genotyped markers, and  
440 unobserved functional polymorphisms, can result in significant statistical epistasis in  
441 genome wide association analyses. This was earlier illustrated empirically for linked  
442 pairs of genotyped predictor SNPs and ungenotyped target polymorphisms in humans  
443 by Wood *et al.* (Wood *et al.* 2014). Here, we present a new example from *A. thaliana*  
444 where significant statistical epistasis between pairs of predictors is due to the effects  
445 at a single loci and that only one of the statistically interacting loci was located near  
446 the target. By exploring the prevalence of second order LD in the genome of the  
447 1001-genomes *A. thaliana* collection, we find that although the total amount of high  
448 order linkage disequilibrium decreases with increasing population sizes, it is still  
449 highly prevalent both within and across chromosomes even in relatively large  
450 populations (n = 728). It is was found to be most common when one predictor is in  
451 high LD to (and located physically near) the target, but many cases exist where the  
452 LD to the individual predictors is very weak but the high order LD is strong. The  
453 choice of target and predictor SNPs in this study is arbitrary and therefore it is  
454 difficult to assess how representative they are for the prevalence of high order LD in  
455 other populations. However, they do suggest that strong high order LD can be  
456 prevalent also in larger populations, indicating that statistical epistasis observed in  
457 studies based on reduced representation genotyping (such as SNP-chips) need to be  
458 interpreted with caution.

459

460 The most prevalent type of high order LD on a genome wide basis is that of cis-trans  
461 predictor pairs, but also cis-cis pairs are common regardless of population size. The  
462 prevalence of trans-trans pairs is high in smaller populations but decreases rapidly as  
463 the population size increases. A possible biological explanation for the observation  
464 that cis-cis and cis-trans high order LD pairs is relatively prevalent also at larger  
465 population sizes would be that the number of, and variation in, the trans located  
466 predictors is sufficiently large on a genome-wide basis to complement any  
467 imperfection in the tagging of the functional polymorphism by the cis located  
468 predictor. Whereas trans-trans high order LD will always result in falsely associated  
469 loci, cis-trans and cis-cis high order LD presents an opportunity to identify true  
470 functional loci for the trait. The problem in a real data analysis is that statistical  
471 epistasis between a pair of predictors can emerge from true interactions or high order  
472 LD within and across chromosomes. However, as the sample sizes increase the risk of  
473 detecting pairs of predictors where none is located close to the true functional  
474 polymorphism decreases. Before concluding that the detected association is due to  
475 two interacting loci, further analyses of the associated pair are however recommended.  
476

477 Whole-genome sequencing provides unprecedented opportunities to genotype most  
478 segregating single nucleotide polymorphisms in the genome. Despite this, it is  
479 unlikely that these will be able to tag all functional polymorphisms, such as larger  
480 structural variants or multi-allelic functional loci due to tandem repeats. Hence, even  
481 though the scenario of reduced representation genotyping with SNP-chips or similar  
482 will soon be a technology of the past, association analyses will still be challenged by  
483 the need to tag hidden polymorphisms with imperfect markers as illustrated in our  
484 analyses of the complex locus affecting molybdenum levels in the *A. thaliana* leaf. In  
485 fact, it is not unlikely that the problem with high order LD between SNP predictors  
486 and hidden, complex functional loci will remain a major challenge in the future as the  
487 increased number of markers generated by sequencing also increases the chance of  
488 finding combinations of cis-cis or cis-trans predictors that tag these functional  
489 polymorphisms better than any single marker. To evaluate the extent of this problem  
490 one will, however, need a more comprehensive dataset than the one studied here  
491 including a more complete scoring of all types of non-SNP polymorphisms in the

492 genome with potential effect on traits of interest.

493

494 The prevalence of high order LD is likely to be more of a concern in populations of  
495 inbred or haploid individuals. These include, for example, inbred lines derived from  
496 bi- and multi-parental crosses of plants and animals, as well as populations of wild  
497 collected inbred plants (Churchill *et al.* 2004; Valdar *et al.* 2006; Kover *et al.* 2009;  
498 Cao *et al.* 2011; Mackay *et al.* 2012). As heterozygotes are not present in these  
499 populations, the number of multi locus genotype classes is smaller than in outbred  
500 populations, making them attractive for studies of genetic interactions. As a common  
501 approach to detect interactions in such populations is to identify pairs of loci  
502 displaying significant statistical epistasis, such results need to be interpreted with  
503 caution, as the analyzed populations are generally small. If one, or more, of the  
504 functional polymorphisms in the genome are unknown and poorly tagged by the  
505 genotyped markers, there is a risk that statistical interactions arise from high-order LD  
506 between the genotyped markers and the hidden functional polymorphisms. Hence,  
507 even though these populations increase the power to map loci displaying statistical  
508 epistasis, there is also a risk of falsely concluding that the underlying genetic  
509 architecture involves genetic interactions.

510

511

## CONCLUSIONS

512 Statistical epistasis detected in genome wide association analyses can result from high  
513 order LD between genotyped markers and unobserved functional polymorphisms.  
514 This study revealed extensive and strong genome wide high order LD between pairs  
515 of markers on a high density 250k SNP-chip and individual markers revealed by  
516 whole genome sequencing in the *A. thaliana* 1001-genomes collection. The high  
517 prevalence of strong high order LD in this dataset suggests that epistatic variance  
518 detected between pairs of markers in association analyses, especially in small inbred  
519 populations genotyped for reduced representation sets of markers, need to be  
520 interpreted with caution. An empirical example is presented where a pair of markers  
521 with significant statistical epistasis in a genome wide association analysis is in high  
522 order LD with a complex multi allelic locus with large effects on the analyzed trait.  
523 As complex functional loci such as this are unlikely to be captured by individual bi-  
524 allelic SNP markers, even if millions of them are scored by whole genome sequencing,

525 it is important to evaluate also other explanations of statistical epistasis than  
526 underlying genetic interactions in particular when small populations of inbred  
527 individuals are studied.

528

529

#### **ACKNOWLEDGEMENTS**

530 This study was funded by grants from the Swedish Research Council (2012-4634) and  
531 the Swedish Research Council Formas (2013-450) to ÖC.

532

533

#### **AUTHOR CONTRIBUTIONS**

534 ÖC and SF initiated the study. ÖC, SF and YZ designed the project and the statistical  
535 analyses; SF and YZ wrote analysis scripts and performed the data analyses. ÖC and  
536 YZ summarized the results and wrote the initial version of the manuscript. All authors  
537 contributed to the writing of the final version of the manuscript.

538

539

#### **DISCLOSURE DECLARATION**

540 The authors declare no competing interest.

541

542

#### **SUPPLEMENTARY MATERIAL**

543 Supplementary material is provided in Supplementary Figure 1 and Supplementary  
544 Table 1.

545

546

#### **REFERENCES:**

547 1001 Genomes Consortium., 2016 1,135 Genomes Reveal the Global Pattern of  
548 Polymorphism in *Arabidopsis thaliana*. *Cell* **166**: 481–491.

549 Anholt R. R. H., Dilda C. L., Chang S., Fanara J.-J., Kulkarni N. H., et al., 2003 The  
550 genetic architecture of odor-guided behavior in *Drosophila*: epistasis and the  
551 transcriptome. *Nat Genet* **35**: 180–184.

552 Atwell S., Huang Y. S., Vilhjálmsson B. J., Willems G., Horton M., et al., 2010  
553 Genome-wide association study of 107 phenotypes in *Arabidopsis thaliana* inbred  
554 lines. *Nature* **465**: 627–631.

555 Aulchenko Y. S., Ripke S., Isaacs A., van Duijn C. M., 2007 GenABEL: an R

- 556 package for genome-wide association analysis. *Bioinformatics* **23**: 1294–1296.
- 557 Baxter I., Brazelton J. N., Yu D., Huang Y. S., Lahner B., et al., 2010 A coastal cline  
558 in sodium accumulation in *Arabidopsis thaliana* is driven by natural variation of  
559 the sodium transporter *AtHKT1;1*. *PLoS Genet* **6**: e1001193.
- 560 Caicedo A., Stinchcombe J., Olsen K., Schmitt J., Purugganan M., 2004 Epistatic  
561 interaction between *Arabidopsis* *FRI* and *FLC* flowering time genes generates a  
562 latitudinal cline in a life history trait. *Proceedings of the National Academy of*  
563 *Sciences of the United States of America* **101**: 15670.
- 564 Cao J., Schneeberger K., Ossowski S., Günther T., Bender S., et al., 2011 Whole-  
565 genome sequencing of multiple *Arabidopsis thaliana* populations. *Nat Genet* **43**:  
566 956–963.
- 567 Carlborg Ö., Jacobsson L., Åhgren P., Siegel P., Andersson L., 2006 Epistasis and the  
568 release of genetic variation during long-term selection. *Nat Genet* **38**: 418–420.
- 569 Churchill G. A., Airey D. C., Allayee H., Angel J. M., Attie A. D. et al., 2004 The  
570 Collaborative Cross, a community resource for the genetic analysis of complex  
571 traits. *Nat Genet* **36**: 1133–1137.
- 572 Forsberg S. K. G., Carlborg Ö., 2017 On the relationship between epistasis and  
573 genetic variance heterogeneity. *Journal of Experimental Biology* **68**:5341-5438.
- 574 Forsberg S. K. G., Andreatta M. E., Huang X.-Y., Danku J., Salt D. E. et al., 2015  
575 The Multi-allelic Genetic Architecture of a Variance-Heterogeneity Locus for  
576 Molybdenum Concentration in Leaves Acts as a Source of Unexplained Additive  
577 Genetic Variance. (GP Copenhaver, Ed.). *PLoS Genet* **11**: e1005648.
- 578 Forsberg S. K. G., Bloom J. S., Sadhu M. J., Kruglyak L., Carlborg Ö., 2017  
579 Accounting for genetic interactions improves modeling of individual quantitative  
580 trait phenotypes in yeast. *Nat Genet* **49**: 497–503.
- 581 Hao K., Di X., Cawley S., 2007 LdCompare: rapid computation of single- and  
582 multiple-marker  $r^2$  and genetic coverage. *Bioinformatics* **23**: 252–254.

- 583 Hemani G., Shakhbazov K., Westra H.-J., Esko T., Henders A. K. et al., 2014  
584 Detection and replication of epistasis influencing transcription in humans. *Nature*  
585 **508**: 249–253.
- 586 Horton M. W., Hancock A. M., Huang Y. S., Toomajian C., Atwell S. et al, 2012  
587 Genome-wide patterns of genetic variation in worldwide *Arabidopsis thaliana*  
588 accessions from the RegMap panel. *Nat Genet* **44**: 212–216.
- 589 Huang W., Mackay T. F. C., 2016 The Genetic Architecture of Quantitative Traits  
590 Cannot Be Inferred from Variance Component Analysis (X Zhu, Ed.). *PLoS*  
591 *Genet* **12**: e1006421.
- 592 Kover P. X., Valdar W., Trakalo J., Scarcelli N., Ehrenreich I. M. et al, 2009 A  
593 Multiparent Advanced Generation Inter-Cross to fine-map quantitative traits in  
594 *Arabidopsis thaliana*. *PLoS Genet* **5**: e1000551.
- 595 Lachowiec J., Shen X., Queitsch C., Carlborg Ö., 2015 A Genome-Wide Association  
596 Analysis Reveals Epistatic Cancellation of Additive Genetic Variance for Root  
597 Length in *Arabidopsis thaliana*. *PLoS Genet* **11**: e1005541.
- 598 Lynch M., Walsh B., 1997 *Genetics and Analysis of Quantitative Traits*. Sinauer  
599 Assoc.
- 600 Mackay T. F. C., Richards S., Stone E. A., Barbadilla A., Ayroles J. F. et al., 2012  
601 The *Drosophila melanogaster* Genetic Reference Panel. *Nature* **482**: 173–178.
- 602 Nelson R. M., Pettersson M. E., Carlborg Ö., 2013 A century after Fisher: time for a  
603 new paradigm in quantitative genetics. *Trends Genet* **29**: 669–676.
- 604 Phillips P. C., 2008 Epistasis--the essential role of gene interactions in the structure  
605 and evolution of genetic systems. *Nat Rev Genet* **9**: 855–867.
- 606 Platt A., Vilhjálmsson B. J., Nordborg M., 2010 Conditions under which genome-  
607 wide association studies will be positively misleading. *Genetics* **186**: 1045–1052.
- 608 Sackton T. B., Hartl D. L., 2016 Genotypic Context and Epistasis in Individuals and  
609 Populations. *Cell* **166**: 279–287.



- 610 Segrè D., Deluna A., Church G. M., Kishony R., 2004 Modular epistasis in yeast  
611 metabolism. *Nat Genet*: 1–7.
- 612 Shen X., Pettersson M., Rönnegård L., Carlborg Ö., 2012 Inheritance beyond plain  
613 heritability: variance-controlling genes in *Arabidopsis thaliana*. *PLoS Genet* **8**:  
614 e1002839.
- 615 Shimomura K., Low-Zeddies S., King D., Steeves T., Whiteley A. et al., 2001  
616 Genome-wide epistatic interaction analysis reveals complex genetic determinants  
617 of circadian behavior in mice. *Genome Research* **11**: 959.
- 618 Valdar W., Solberg L. C., Gauguier D., Burnett S., Klenerman P. et al., 2006  
619 Genome-wide genetic association of complex traits in heterogeneous stock mice.  
620 *Nat Genet* **38**: 879–887.
- 621 Wood A. R., Tuke M. A., Nalls M. A., Hernandez D. G., Bandinelli S. et al., 2014  
622 Another explanation for apparent epistasis. *Nature* **514**: E3–5.
- 623
